# Supplementary material
Source: PubMed Central journal article supplement (PMC4478797)
Supplement: supp_fj.14-265215_Supplemental_Figure1.pdf [file supp_fj.14-265215_Supplemental_Figure1.pdf]

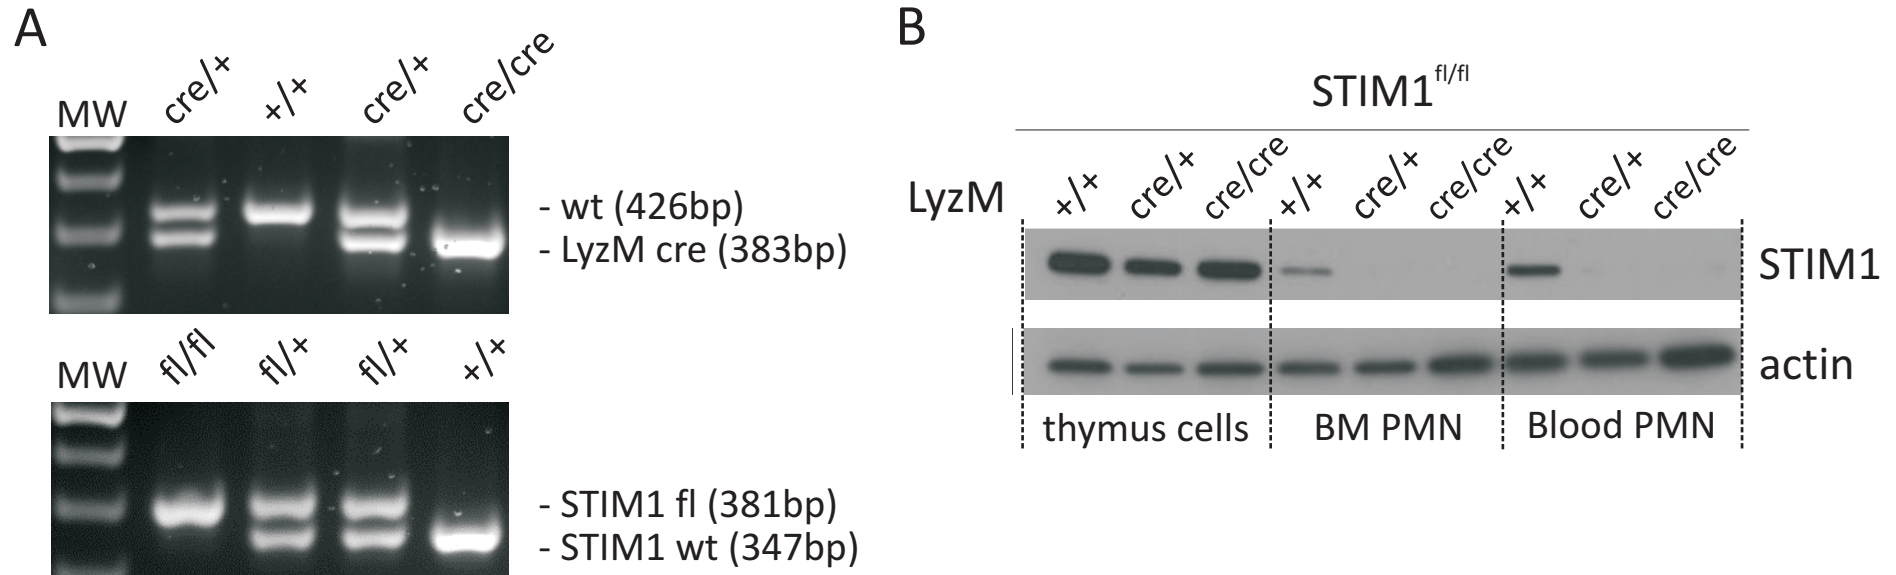

**Supplemental Figure 1: Conditional gene targeting of mouse *STIM1***

(A) Typical results of genotyping by PCR. Cre Lysozyme expression primers are: 5'-ATGCTGCAGTTTCCTCTCTGGTCA-3' (Wild Type), 5'-CCACGACCGGCAAACGGA CA-3' (CRE Lysozyme) and 5'-CTTGGGCTGCCAGAATTTCTC-3' (Common). Distinction between unfloxed and floxed *STIM1* was done by PCR using the following primers: 5'-CGATGGTCTCACGGTCTCTAGTTTC-3' (Wild type *STIM1*) or 5'-GGCTCTGCTGACCTGGAAGTATAGTG-3' (Floxed *STIM1*) (Oh-Hora et al. Dual functions for the endoplasmic reticulum calcium sensors *STIM1* and *STIM2* in T cell activation and tolerance. *Nat Immunol* 2008;9:432-443). (B) *STIM1* expression in thymus cells, bone marrow isolated neutrophil (BM PMN) or total blood isolated neutrophils (Blood PMN). Approximately 26  $\mu$ g of protein were load per lane of the SDS-polyacrylamide gel.
