# Supplementary material
Source: PubMed Central journal article supplement (PMC4478797)
Supplement: supp_fj.14-265215_Supplemental_Figure2.pdf [file supp_fj.14-265215_Supplemental_Figure2.pdf]

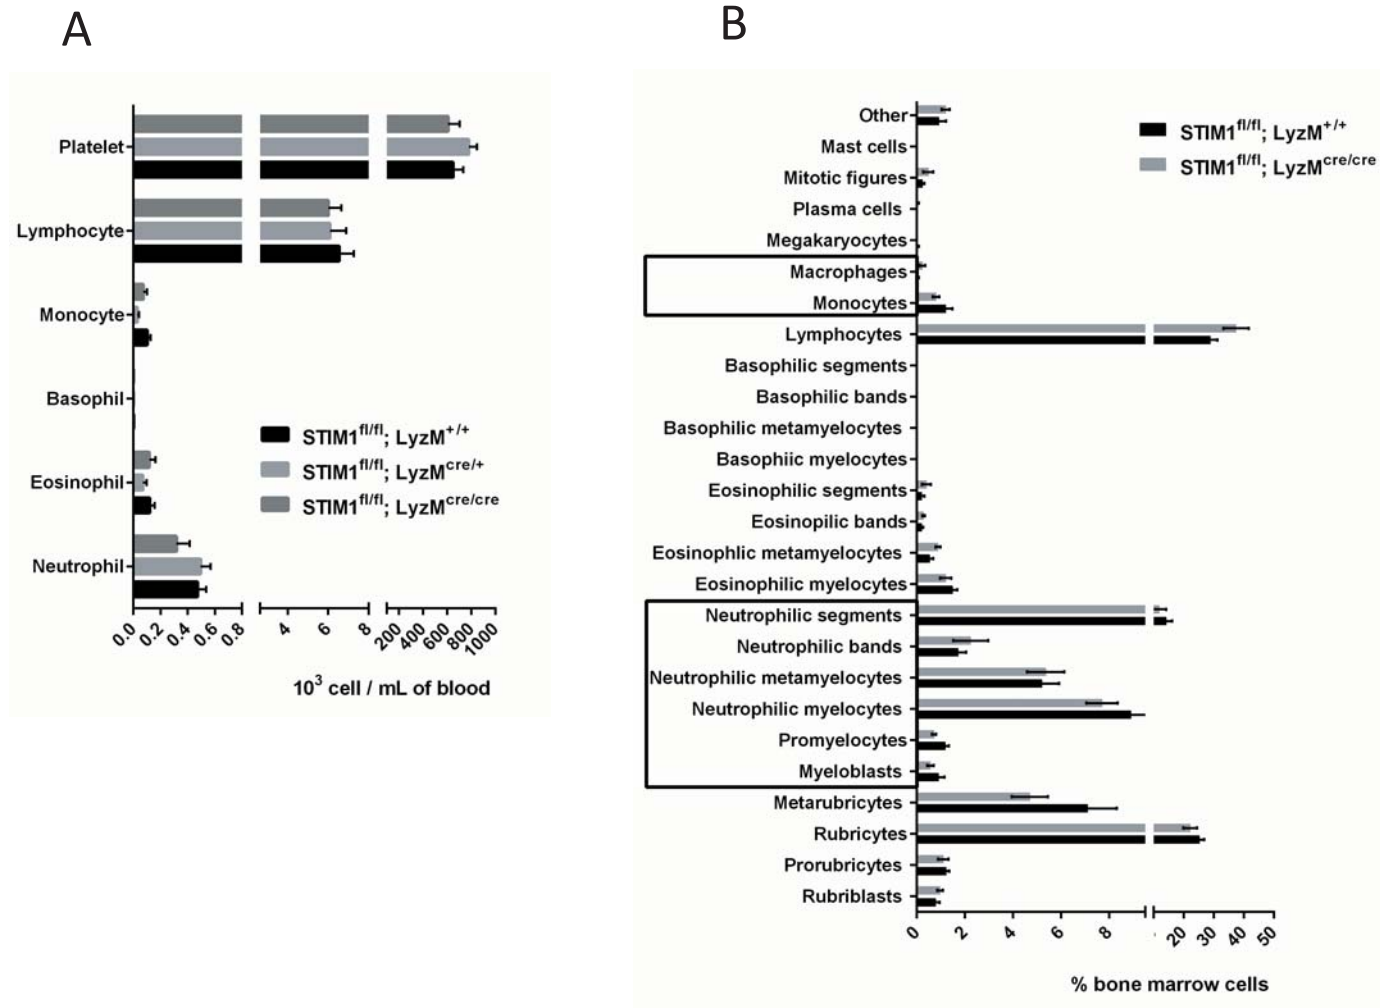

**Supplemental Figure 2: Blood and bone marrow cell counts**

(A) Complete blood count using whole blood collected with EDTA as anticoagulant. White blood cell differential counts (100 cells) were carried out by microscopic evaluation of Romanowsky-stained blood smears. Means  $\pm$  SEM of 8 mice per group. (B) Romanowsky-stained bone marrow differential counts (500 cells) performed on brush prep slides. Means  $\pm$  SEM of 5 mice per group. For details see Materials and Methods
