# Supplementary material
Source: PubMed Central journal article supplement (PMC4478797)
Supplement: supp_fj.14-265215_Supplemental_Figure3.pdf [file supp_fj.14-265215_Supplemental_Figure3.pdf]

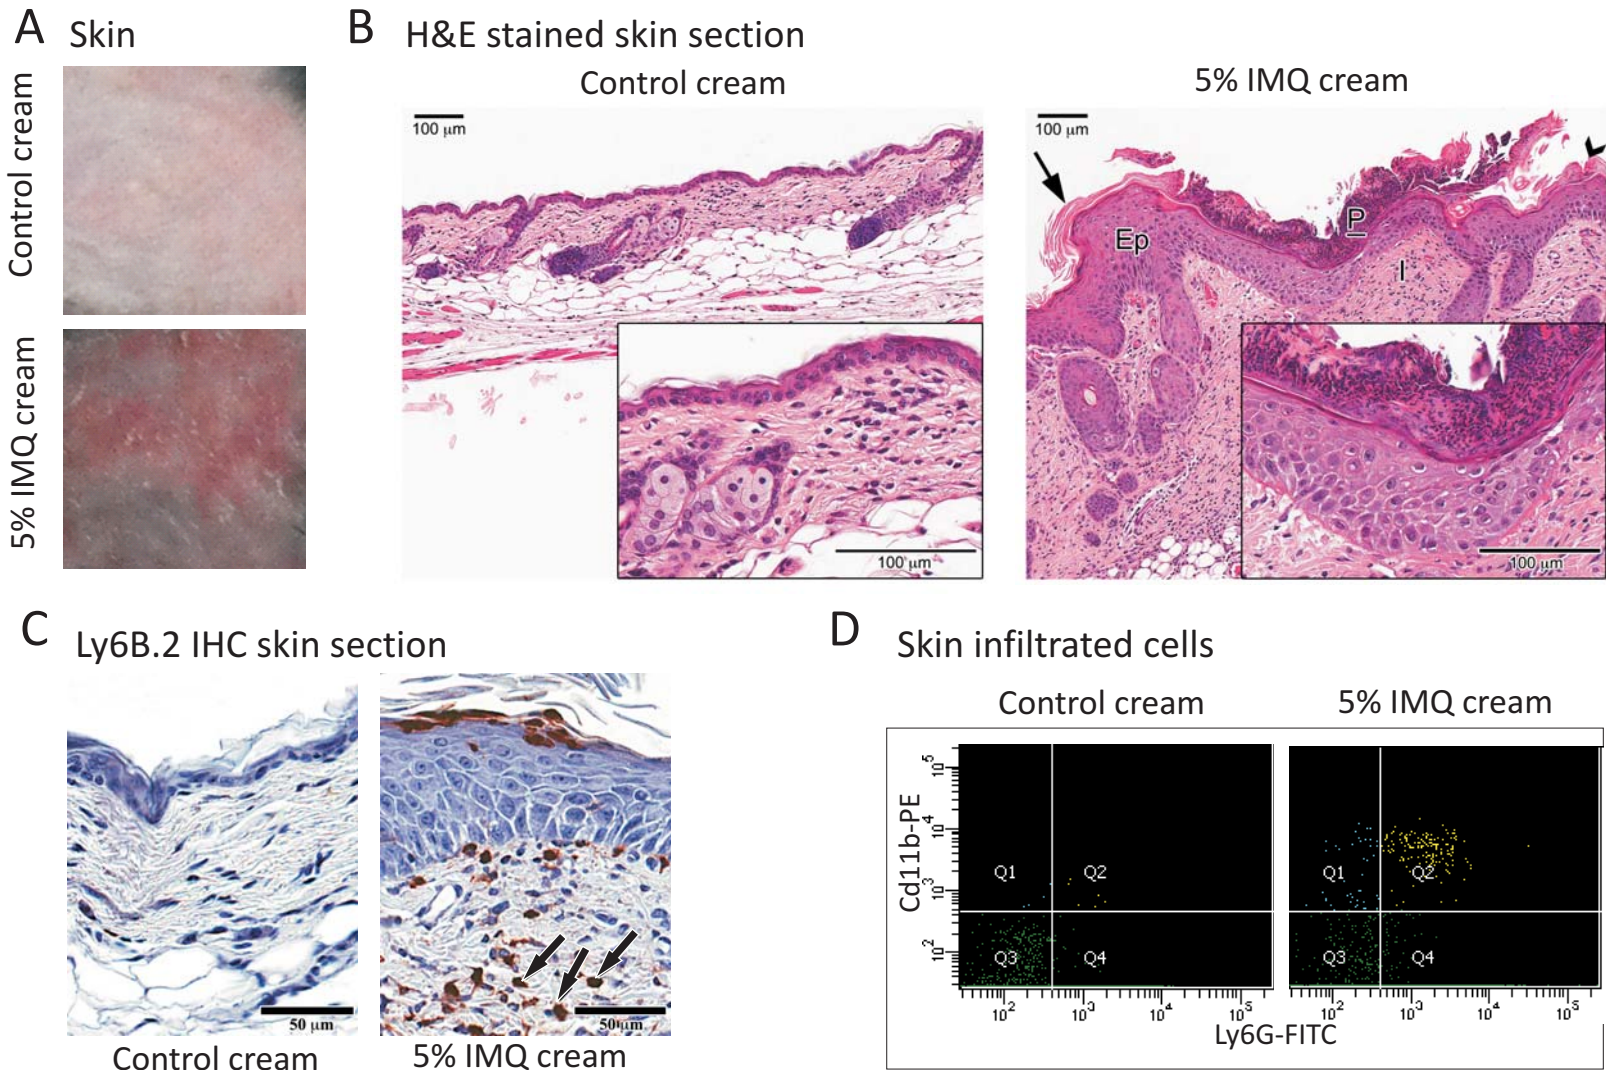

***Supplemental Figure 3: IMQ-induced psoriasis-like plaque***

Comparisons of skin samples from mice treated daily with control cream or 5% IMQ Aldara® for 5 days. (A) Appearance of psoriasiform lesions on mouse back skin. (B) H&E staining of back skin sections. The following histological changes are present in the IMQ treated mice: Epidermal hyperplasia [Ep], pustule [P], orthokeratotic hyperkeratosis [arrow], parakeratotic hyperkeratosis [arrow head] and inflammation [I]. (C) Accumulation of Ly6B.2<sup>+</sup> neutrophils in mouse skin detected by immunohistochemistry. (D) Representative density plot showing cell surface markers
