# Supplementary material
Source: PubMed Central journal article supplement (PMC4478797)
Supplement: supp_fj.14-265215_Supplemental_Figure4.pdf [file supp_fj.14-265215_Supplemental_Figure4.pdf]

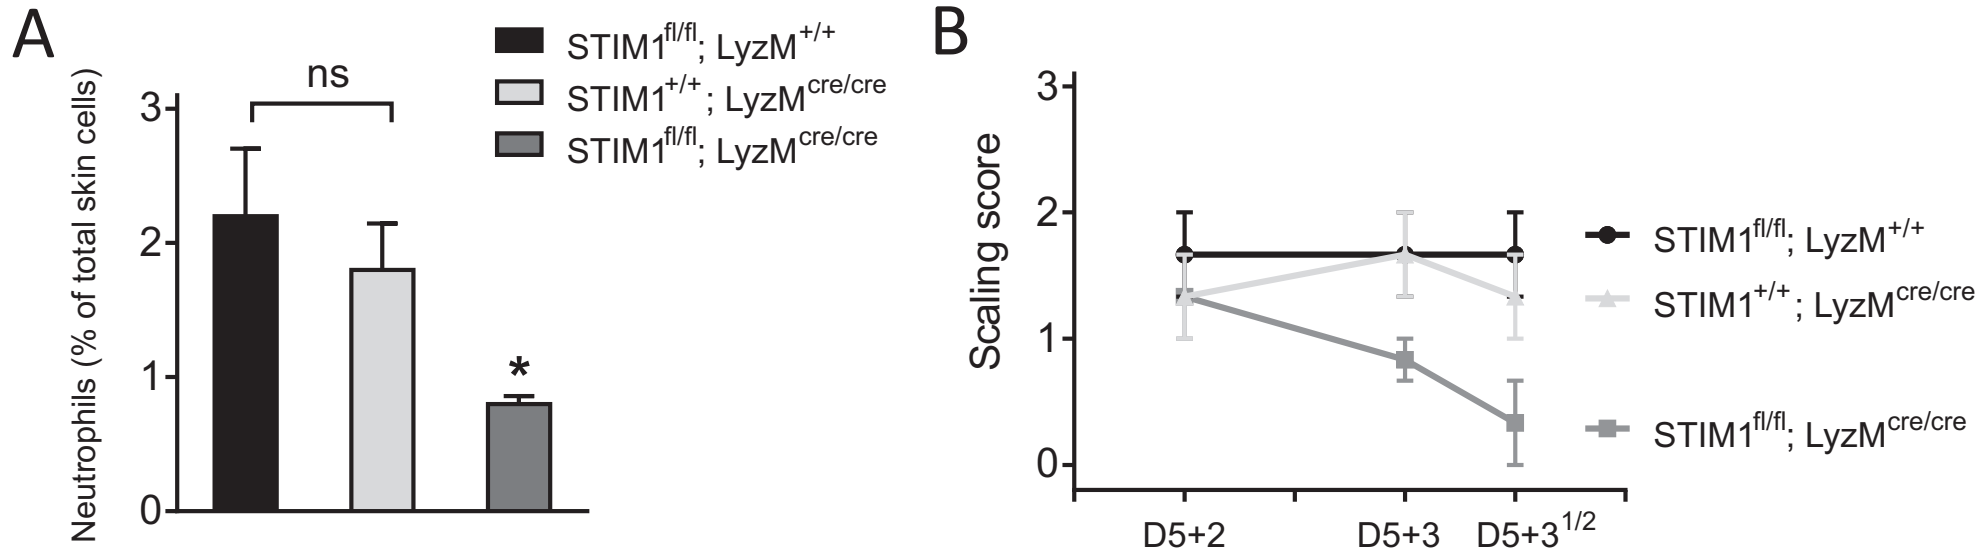

**Supplemental Figure 4: Neutrophil skin infiltration and IMQ-induced psoriasis like plaques in  $STIM^{fl/fl};LyzM^{+/+}$  and  $STIM^{+/+};LyzM-Cre$  control mice**

Neutrophil infiltration and IMQ-induced psoriasis like plaque evolution were analyzed in back skin from mice in remission 2 days (D5+2), 3 days (D5+3) or 3 and half days (D5+3<sup>1/2</sup>) after last IMQ cream application. (A) Flow cytometry analysis of infiltrated neutrophils from dermal single cell suspensions. Percentage of neutrophils is calculated from double positive Ly6G<sup>+</sup>/Cd11b<sup>+</sup> cells. ns denotes no significant difference and \* a significant difference compared with cells from  $STIM^{fl/fl};LyzM^{+/+}$  mice ( $P < 0.1$ ) based on one way ANOVA followed by Bonferroni's post hoc test. Bar graphs show mean values  $\pm$  SEM of 3 mice per group (B) Severity of scaling was evaluated blindly and scored on a scale from 0 to 3. ns denotes no significant difference and \* significant difference for D5+3<sup>1/2</sup> compared with the score from  $STIM^{fl/fl};LyzM^{+/+}$  mice ( $P < 0.1$ ) based on two way ANOVA followed by Bonferroni's post hoc test. Means  $\pm$  SEM from 3 mice per genotype.
